# Supplementary material for: Gold clusters on Nb-doped SrTiO3: effects of metal-insulator transition on heterogeneous Au nanocatalysis
Source: Royal Society of Chemistry journal article supplement (doi:10.1039/c2cp40939a), 2012-01-01
Supplement: c2cp40939a.pdf [file c2cp40939a.pdf]

## Supporting Information

### Gold Clusters on Nb-doped SrTiO<sub>3</sub>: Effects of Metal-Insulator-Transition on Heterogeneous An Nanocatalysis

Miao Zhou<sup>1</sup>, Yuan Ping Feng<sup>1</sup> and Chun Zhang<sup>1,2,\*</sup>

<sup>1</sup> Department of Physics, National University of Singapore, 2 Science Drive 3, Singapore 117542

<sup>2</sup> Department of Chemistry, National University of Singapore, Singapore, 3 Science Drive 3, Singapore 117543

Email: phyzc@nus.edu.sg

### O<sub>2</sub> Adsorption on Au<sub>8</sub>@SrTiO<sub>3</sub> (001) Surface with SrO Termination

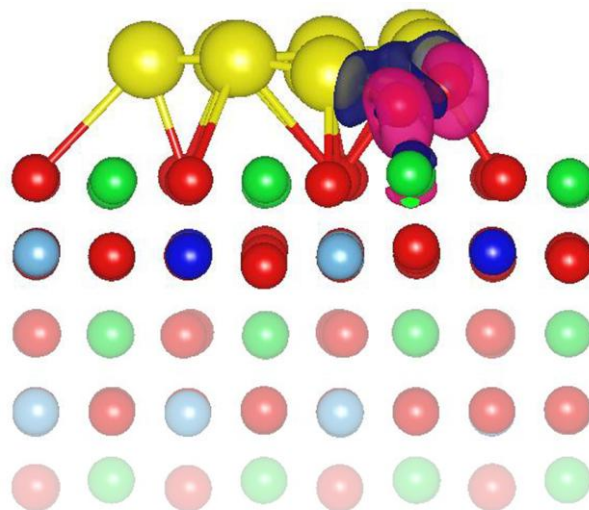

**Figure S1** Relaxed structures for O<sub>2</sub> molecule adsorbed on Au<sub>8</sub>@SrTiO<sub>3</sub> (001) surface with SrO termination doped by Nb (2.08%). Superimposed are the isosurfaces of differential charge density (isovalue=0.02 e/Å<sup>3</sup>). The differential charge is calculated by  $\Delta\rho = \rho(\text{O}_2 + \text{Au}_8 @ \text{SrTiO}_3(001)) - (\rho_{\text{O}_2} + \rho_{\text{Au}_8 @ \text{SrTiO}_3(001)})$ . Blue (red) color indicates the electron depletion (accumulation). It is found that compared to undoped case, the metal-insulator-transition induced charge transfer increases the adsorption energy of the O<sub>2</sub> molecule from 0.82 to 1.36 eV, and the O-O bond length from 1.38 to 1.52 Å.

## ER Type of CO Oxidation Catalyzed by Au<sub>8</sub>@SrTiO<sub>3</sub> (001) Surface with TiO<sub>2</sub> Termination: The First Step

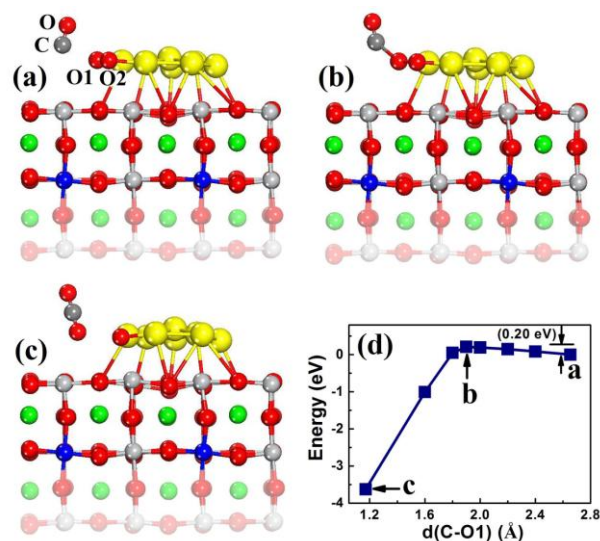

**Figure S2.** ER type of CO oxidation catalyzed by Au<sub>8</sub>@SrTiO<sub>3</sub> (001) surface with TiO<sub>2</sub> termination doped by Nb (1.92%). (a) Initial state: d(O1-O2)=1.43 Å, d(C-O2)=2.65 Å. (b) Transition state: d(O1-O2)=1.50 Å, d(C-O2)=1.9 Å. (c) Final state: the formation of CO<sub>2</sub>. (d) Energy profile along the reaction coordinate.

## The Second Step of Reaction: CO+O→CO<sub>2</sub> for TiO<sub>2</sub> Terminated Surface

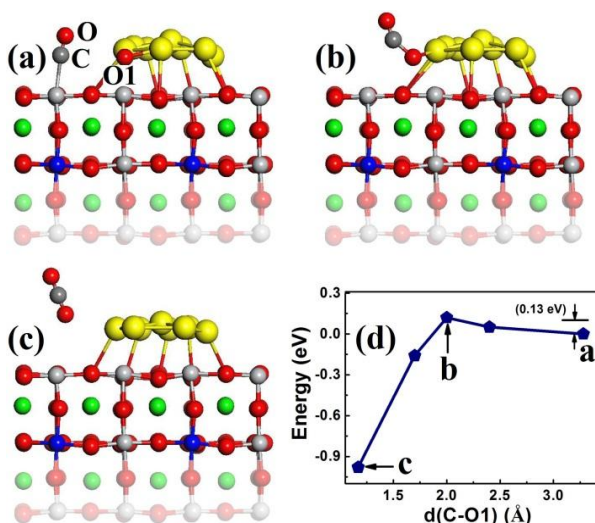

**Figure S5.** The LH mechanism of the second step CO oxidation catalyzed by Au<sub>8</sub>@SrTiO<sub>3</sub> (001) surface with TiO<sub>2</sub> termination doped by Nb (1.92%). (a) Initial state: d(C-O1)=3.28 Å. (b) Transition state: d(C-O1)=2.0 Å. (c) Final state: the formation of CO<sub>2</sub>. (d) Energy profile along the reaction coordinate.

## LH and ER Type of CO Oxidation Catalyzed by Au<sub>8</sub>@SrTiO<sub>3</sub> (001) Surface with SrO Termination: The First Step

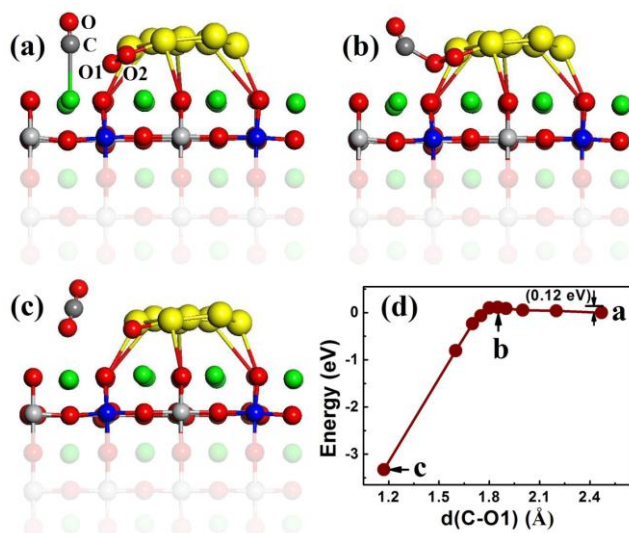

**Figure S3.** LH type of CO oxidation catalyzed by Au<sub>8</sub>@SrTiO<sub>3</sub> (001) surface with SrO termination doped by Nb (2.08%). (a) Initial state: d(O1-O2)=1.52 Å, d(C-O2)=2.46 Å. (b) Transition state: d(O1-O2)=1.56 Å, d(C-O2)=1.75 Å. (c) Final state: the formation of CO<sub>2</sub>. (d) Energy profile along the reaction coordinate.

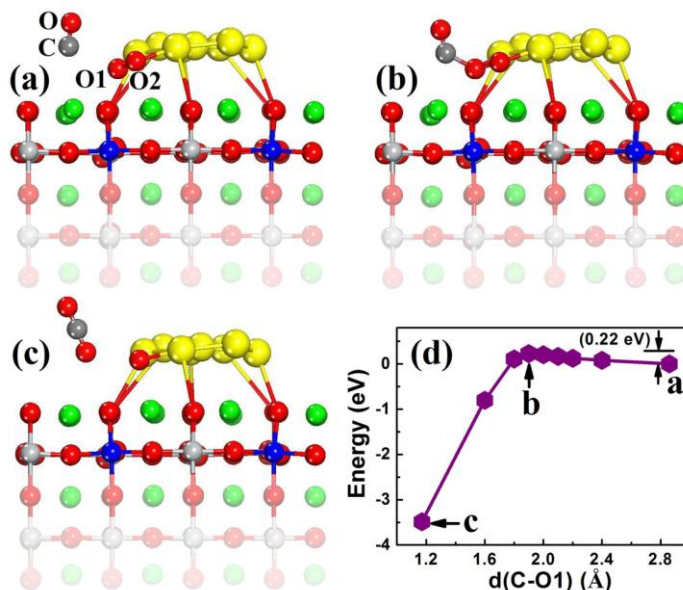

**Figure S4.** ER type of CO oxidation catalyzed by Au<sub>8</sub>@SrTiO<sub>3</sub> (001) surface with SrO termination doped by Nb (2.08%). (a) Initial state: d(O1-O2)=1.52 Å, d(C-O2)=2.86 Å. (b) Transition state: d(O1-O2)=1.53 Å, d(C-O2)=1.9 Å. (c) Final state: the formation of CO<sub>2</sub>. (d) Energy profile along the reaction coordinate.

## The Second Step of Reaction: $\text{CO} + \text{O} \rightarrow \text{CO}_2$ for SrO Terminated Surfaces

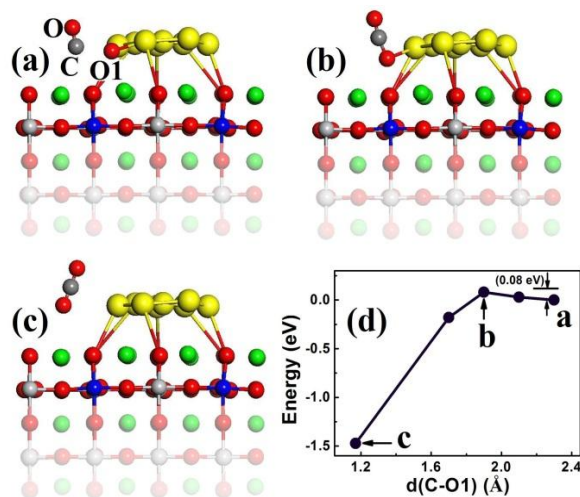

**Figure S6.** ER mechanism of CO oxidation with the remaining O atom catalyzed by  $\text{Au}_8@ \text{SrTiO}_3$  (001) surface with SrO termination doped by Nb (2.08%). (a) Initial state:  $d(\text{C-O1}) = 2.21 \text{ \AA}$ . (b) Transition state:  $d(\text{C-O1}) = 1.9 \text{ \AA}$ . (c) Final state: the formation of  $\text{CO}_2$ . (d) Energy profile along the reaction coordinate.

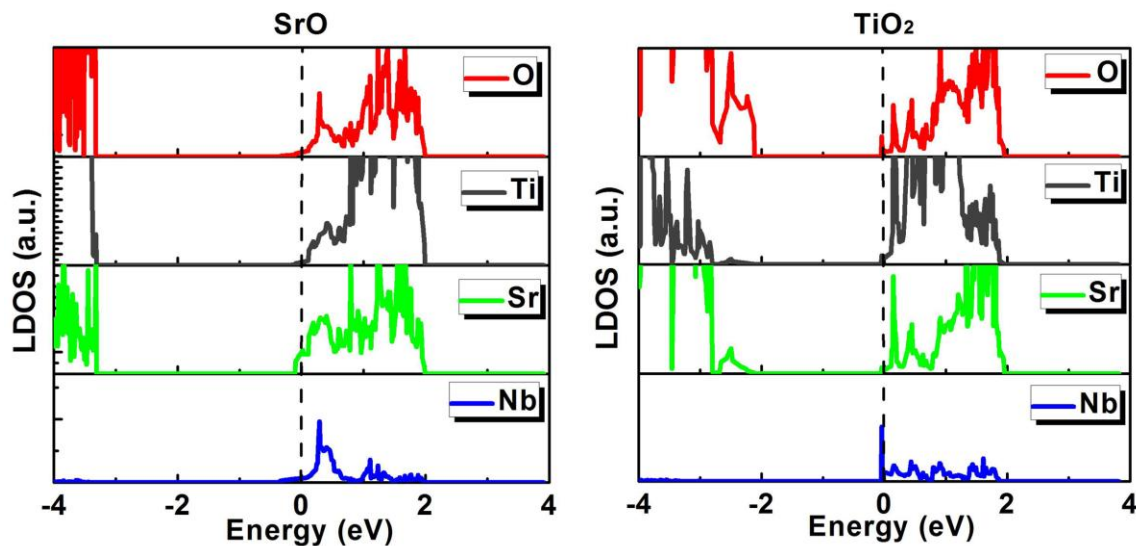

**Fig. S7.** Local density of states (LDOS) projected onto O, Ti, Sr and Nb atoms for Nb-doped  $\text{SrTiO}_3$  (001) surfaces. Left panel shows the SrO-terminated surface with Nb dopant of 0.52%, and right panel shows the  $\text{TiO}_2$ -terminated surface with Nb dopant of 0.48%. Note that there are no gap states.

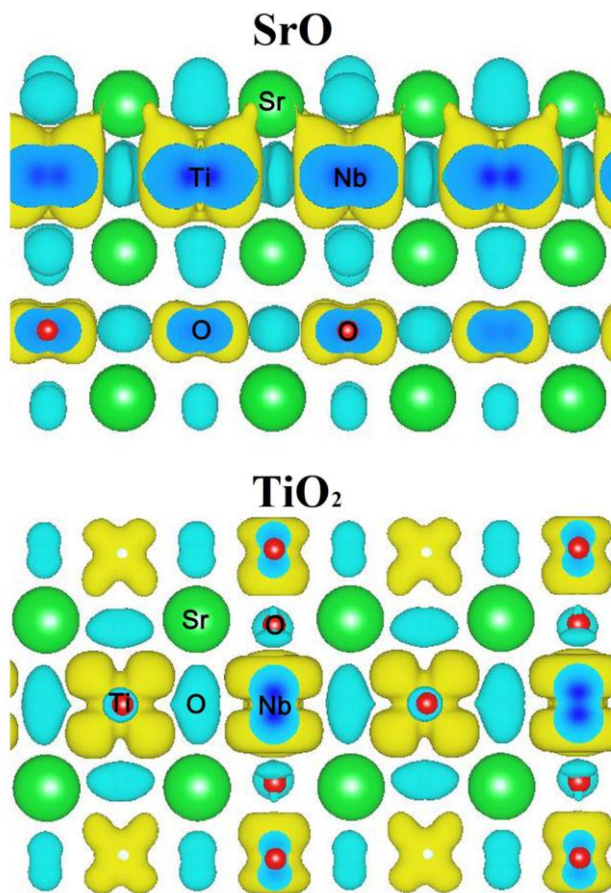

**Fig. S8.** Iso-surface of spin density for Nb-atom-doped SrTiO<sub>3</sub> (001) surface with SrO termination (Upper panel), and TiO<sub>2</sub> termination (lower panel). Note that there is one Nb atom in one supercell. It clearly shows the spin is delocalized over the whole supercell. It is also mentioning here that the magnetic properties of the system is a very complicated issue. Our calculations showed that the doping concentration has very significant effects on the magnetic moment. In many cases, the system is not magnetic.
